# Supplementary material for: The transcription factor grainyhead-like 2 regulates the molecular composition of the epithelial apical junctional complex
Source: Oxford University Press journal article supplement (doi:10.1242/dev.055483), 2010-10-26
Supplement: dev055483-sup-dev55483-tables1.pdf [file dev055483-sup-dev55483-tables1.pdf]

**Table S1. Oligonucleotide sequences****ChIP primers for E-Cadherin locus**

| Position, in kb relative to E-cadherin TSS | Forward primer sequence | Reverse primer sequence |
|--------------------------------------------|-------------------------|-------------------------|
| -4.4                                       | AGGAGGATTGCCTGAAAGT     | GAGAGACGGAGAAGGAACAA    |
| -2.6                                       | AAGAAAGCAACGCTCCAAAG    | AGGGCGAGGACTCTGGTATT    |
| -0.1                                       | CGCACTACTGAGTTCCAAG     | GTCAGGACCCCTCCACATACC   |
| 1.7                                        | AAGGCAAGAGGACCAGGTTT    | CCCAGAAAAGGGATTGTGTGT   |
| 3.6                                        | AACCGAGGATTGTGACCTTG    | GGATATGCTTGGGTAGTGGA    |
| 7.8 (primer pair A)                        | GAAGCCTTTCCTTTCCATT     | ACCCTTCTAAGGCACAGCA     |
| 7.8 (primer pair B)                        | CAGCAAACAGTCAAACAG      | TTTCTAAGGCACAGCAAACC    |
| 9.5                                        | AGGTGGGAAGGAAACCAGTC    | CAGGTTTCATCTTCAGGCACA   |

**ChIP primers for *Cldn4* locus**

| Position, in kb relative to <i>Cldn4</i> TSS | Forward primer sequence | Reverse primer sequence |
|----------------------------------------------|-------------------------|-------------------------|
| -0.1                                         | GTGATACTGGCGGGTGACTC    | GGGACCAGTTTCTCTGGATTTC  |
| 2.8                                          | ACAGGGAAGGGTCTGTGTG     | GGTCTTGATCCTGGCTGA      |

**Real-time RT-PCR primers**

| Gene                                    | Forward primer sequence | Reverse primer sequence |
|-----------------------------------------|-------------------------|-------------------------|
| $\beta$ -Actin (mouse, rat, human, dog) | TTCAACACCCAGCCATGTA     | GTGGTGGTGAAGCTGTAGCC    |
| <i>Grhl1</i> (mouse)                    | AAATTTCGGATGAAGAACGA    | TCAGCTTAGCAGGAGGAGGA    |
| <i>Grhl2</i> (mouse, rat, human, dog)   | CAAAGCAAGTGACAGCCAAG    | CCTTGTTGAGGTAGGTATGG    |
| <i>Grhl2</i> (mouse)                    | ACCATCGGGAACATTGAAGA    | TCCGGTCTCTGTAGGTTTG     |
| <i>Grhl3</i> (mouse)                    | GCCTACCTCAACAAGGGTCA    | TGCCTGCTCCACAGTCATAG    |
| E-cadherin (mouse, rat, human, dog)     | AAGGGCTTGATTTTGAGG      | AGATGGGGGCTTCATTAC      |
| E-cadherin (mouse)                      | CGTCCATGTGTGACTGTG      | GGAGCCACATCATTTGAGT     |
| <i>Cldn4</i> (mouse)                    | GCCGTCTATGGGACTACAG     | GGTTGTAGAAGTCGCGGATG    |

**Primers used for genotyping**

| DNA fragment                         | Forward primer sequence  | Reverse primer sequence    |
|--------------------------------------|--------------------------|----------------------------|
| Grhl2-LacZ1 mutant allele (500 bp)   | AAAGGCATCAAGGTGTGAGC     | GTGCGCATAGTGGCTTGAAT       |
| Grhl2-LacZ1 wildtype allele (621 bp) | CACGTAGACGAGCTCTGTGG     | GTGGGCAGTTGGTGTGAG         |
| Grhl2-LacZ4 mutant allele (261 bp)   | TGCATGCTGAACTCTGGAGGTGGT | ACTTCCGGAGCGATCTCAAACCTCTC |
| Grhl2-LacZ4 wildtype allele (396 bp) | TGCATGCTGAACTCTGGAGGTGGT | ACAGCTCAGCACATGAAGCATCATG  |

**Primers for production of riboprobes**

| Gene         | Forward primer sequence | Reverse primer sequence (including T7 promoter sequences)     |
|--------------|-------------------------|---------------------------------------------------------------|
| E-cadherin   | ATCGCTACACCATCGTCAG     | GGCCAGTGAATTGTAATACGACTCACTATAGGG<br>AGGCGGTATGAGGCTGTGGTTCTC |
| <i>Cldn4</i> | TGCTTCTCTCAGTGGTAGGG    | GGCCAGTGAATTGTAATACGACTCACTATAGGG<br>AGGCGGTAAGGAGCCATGTGGA   |

**Primers for 3C assay**

| Primer                | Primer sequence           | Distance from <i>Bgl</i> II site |
|-----------------------|---------------------------|----------------------------------|
| Control reverse (cr)  | ATTCTCTCTTTCCGCCATATGTA   | 124 bp                           |
| Promoter reverse (pr) | TTTGTITTTGTTGTTGTCTTTT    | 86 bp                            |
| Enhancer reverse (er) | AGAGTGGTGAATCCCTGTATATCAA | 50 bp                            |

**Oligos for Splinkerette (SPLK) PCR**

| Oligo                      | Oligo sequence                                               |
|----------------------------|--------------------------------------------------------------|
| SPLK adaptor A             | CGAAGAGTAACCGTTGCTAGGAGAGACCGTGGCTGAATGAGACTGGTGTGACACTAGTGG |
| SPLK adaptor B             | GATCCCACTAGTGTGACACCAAGTCTCTAATTTTTTTTTTCAAAAAAA             |
| SPLK forward primer outer  | CGAAGAGTAACCGTTGCTAGGAGAGACC                                 |
| SPLK reverse primer outer  | GCTCTGTCTCCAGTCTCCTCCAC                                      |
| SPLK forward primer nested | GTGGCTGAATGAGACTGGTGTGAC                                     |
| SPLK reverse primer nested | ACACACTCCAACCTCCGAAACTC                                      |
