# Supplementary figures and images for: The transcription factor grainyhead-like 2 regulates the molecular composition of the epithelial apical junctional complex
Source: Oxford University Press journal article supplement (doi:10.1242/dev.055483), 2010-10-26

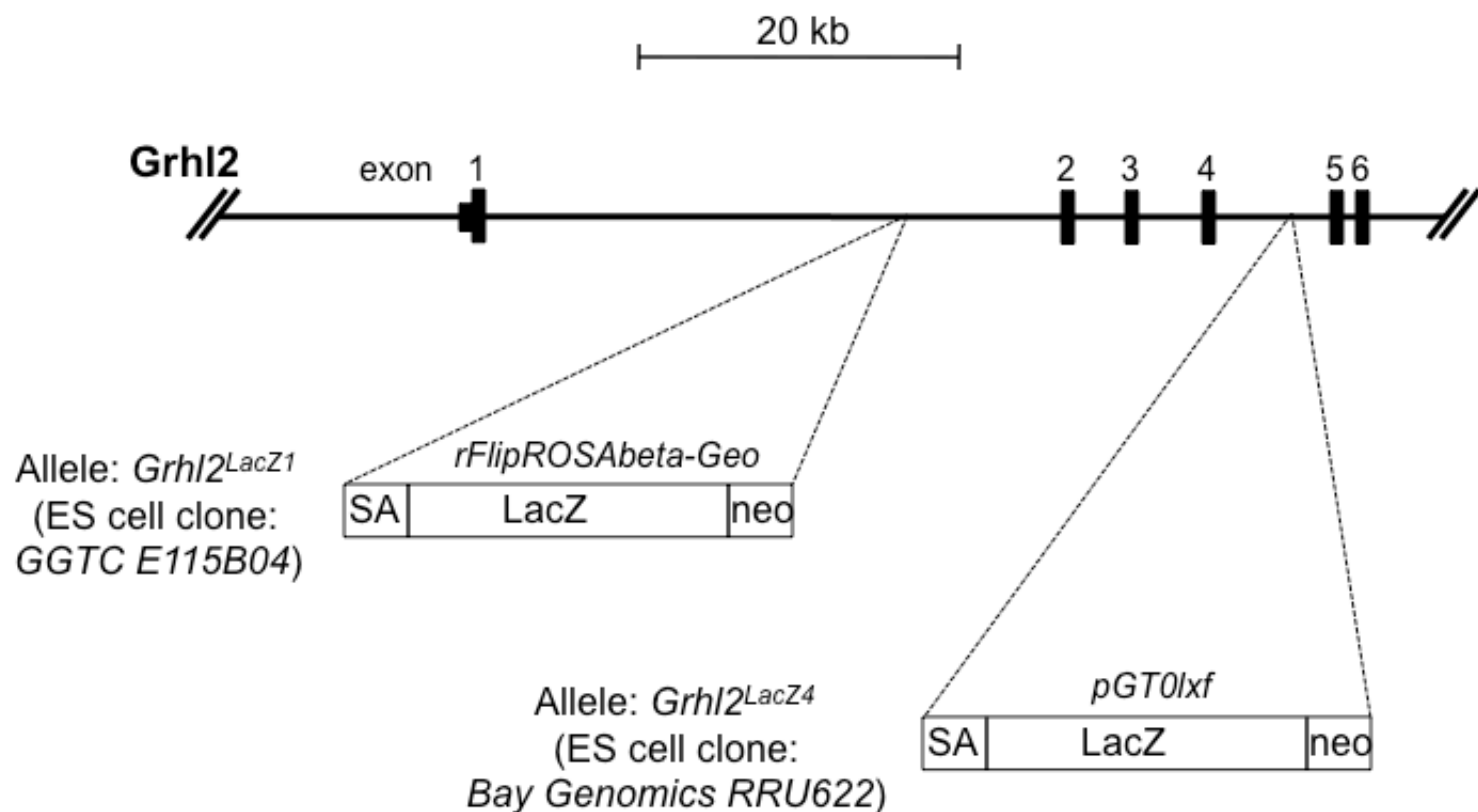

Supplement: dev055483figs1.pdf [file dev055483figs1.pdf]

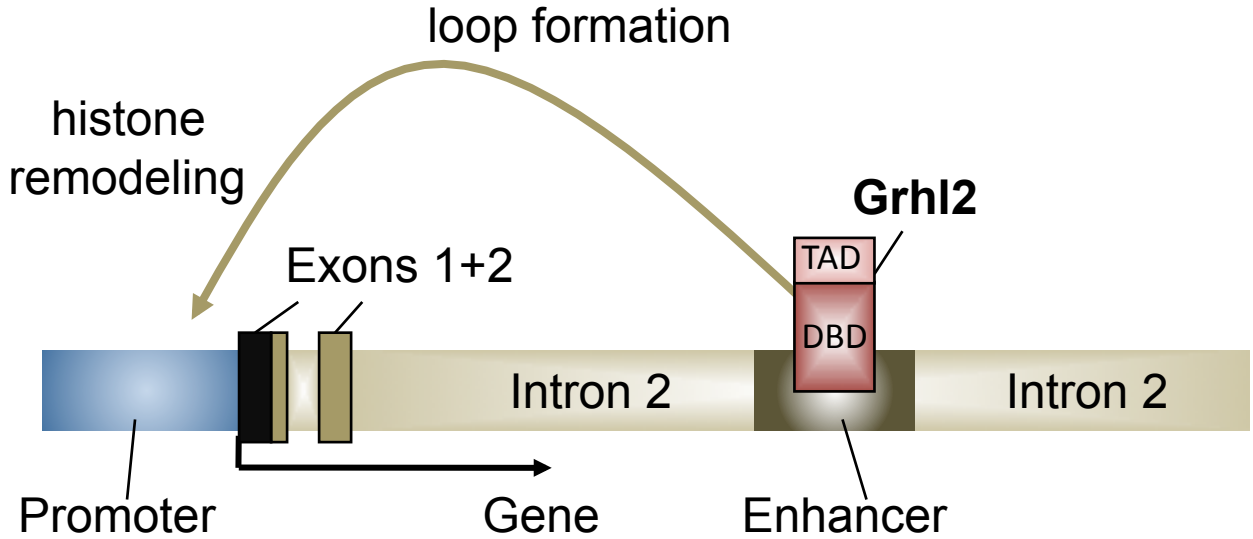

**E-cadherin locus**

Supplement: dev055483figs10.pdf [file dev055483figs10.pdf]

**A**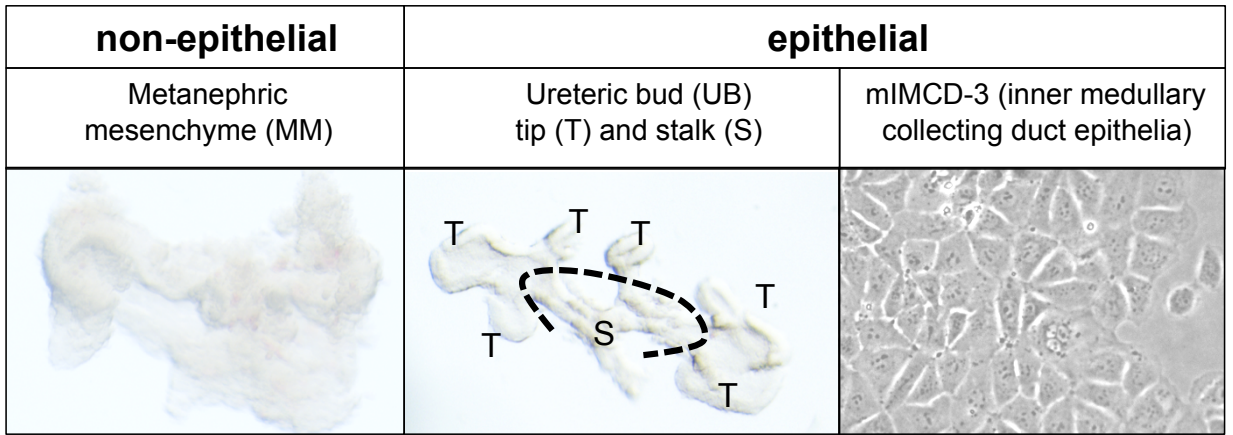**B**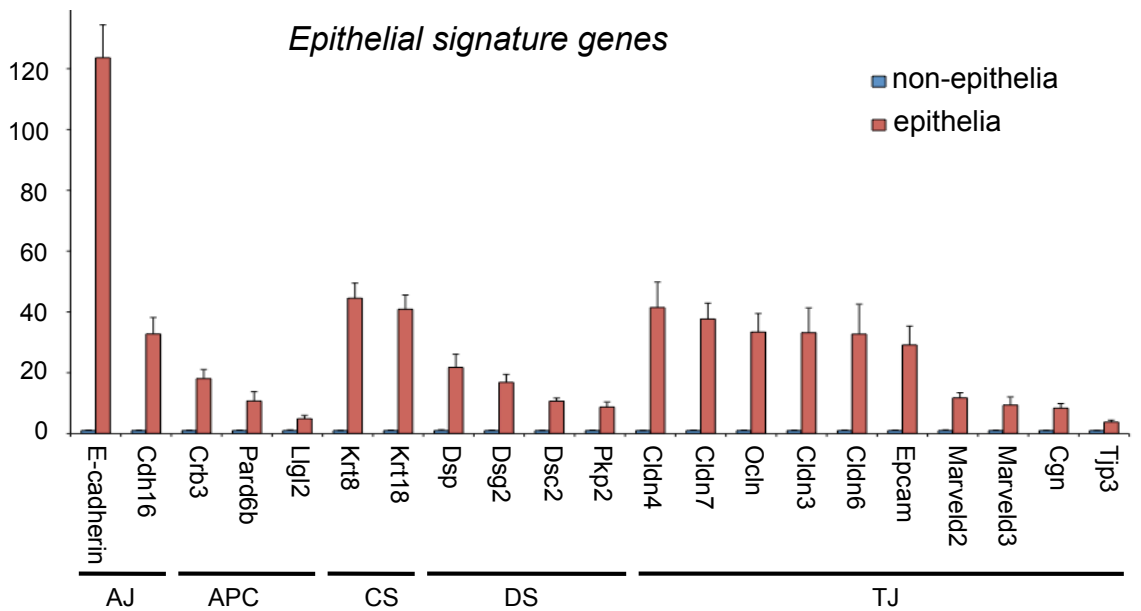**C**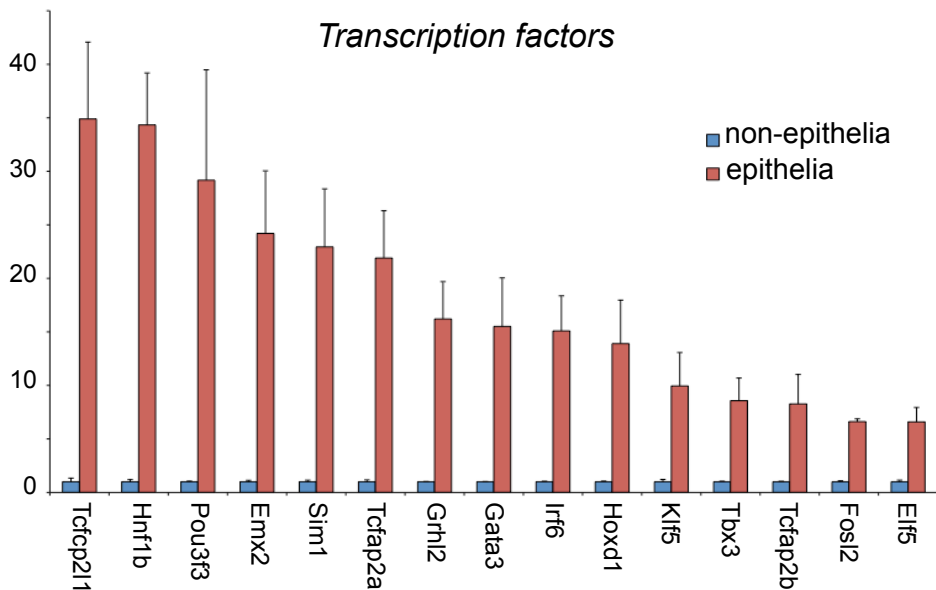

Supplement: dev055483figs2.pdf [file dev055483figs2.pdf]

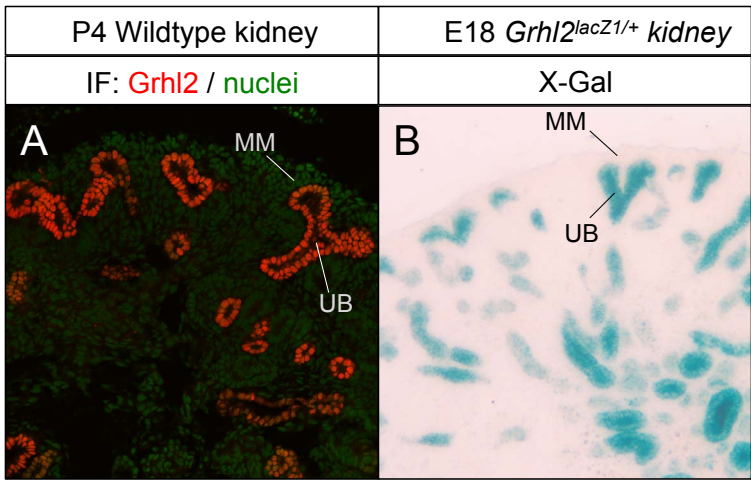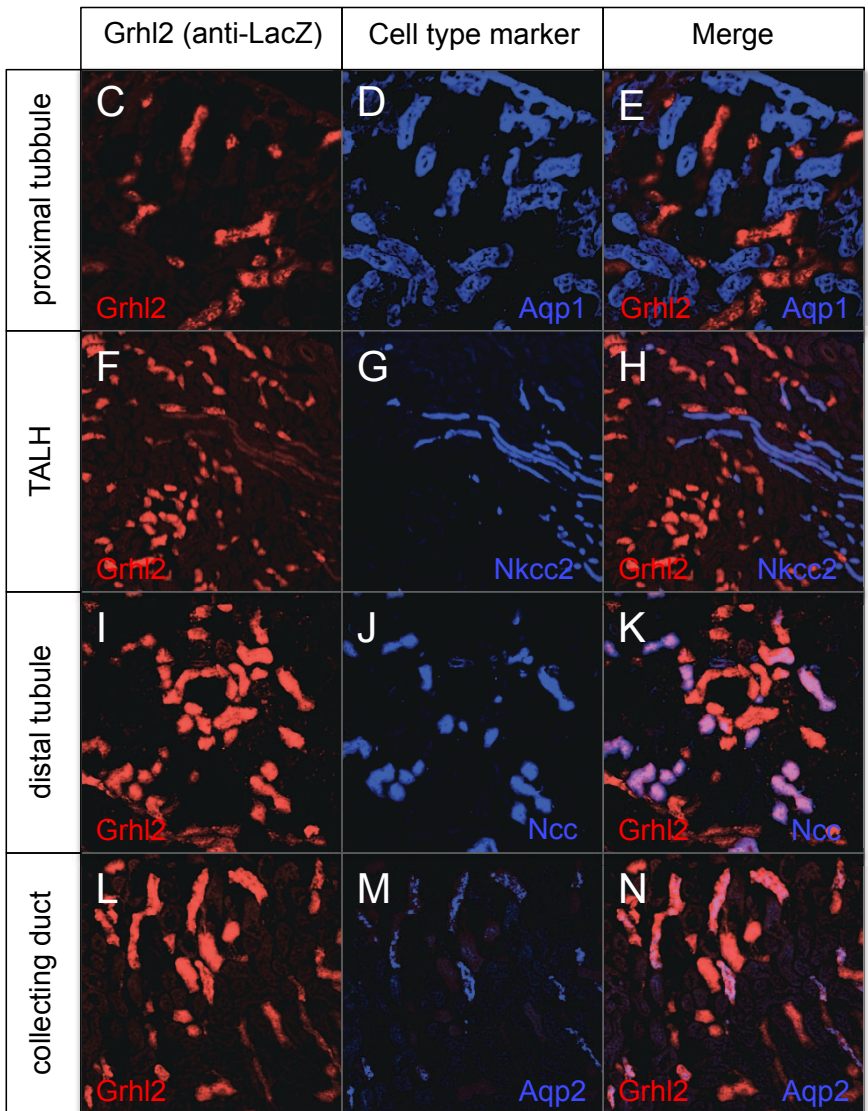

Supplement: dev055483figs3.pdf [file dev055483figs3.pdf]

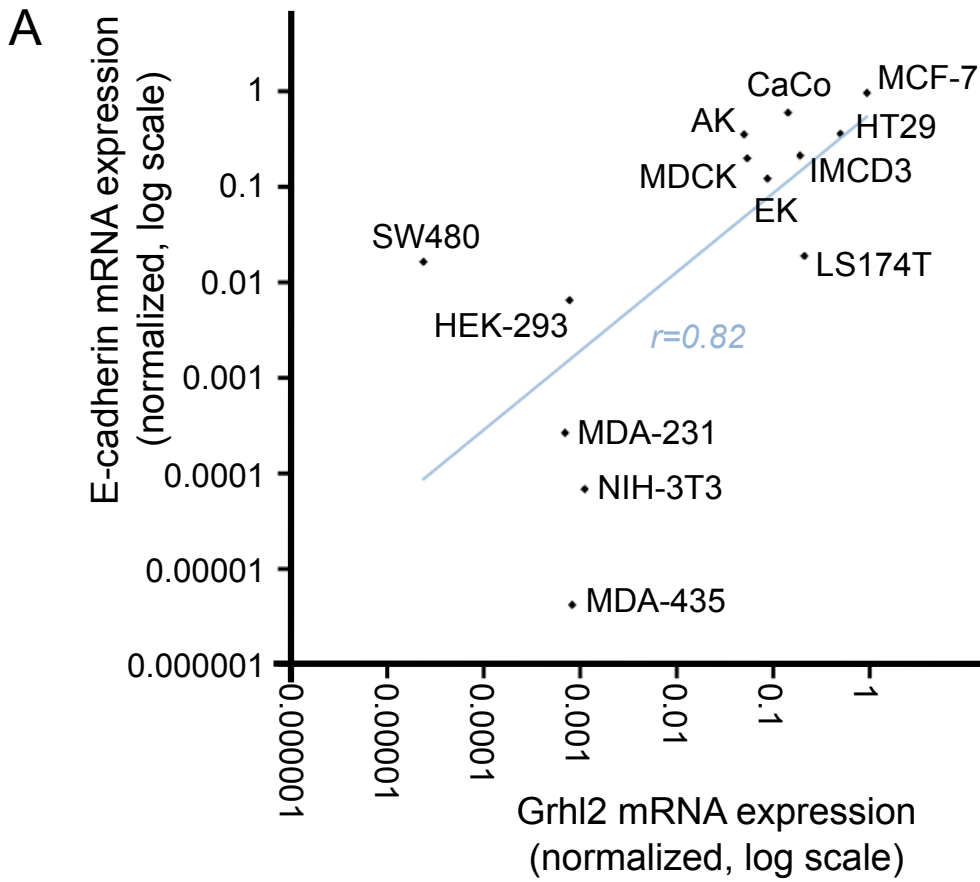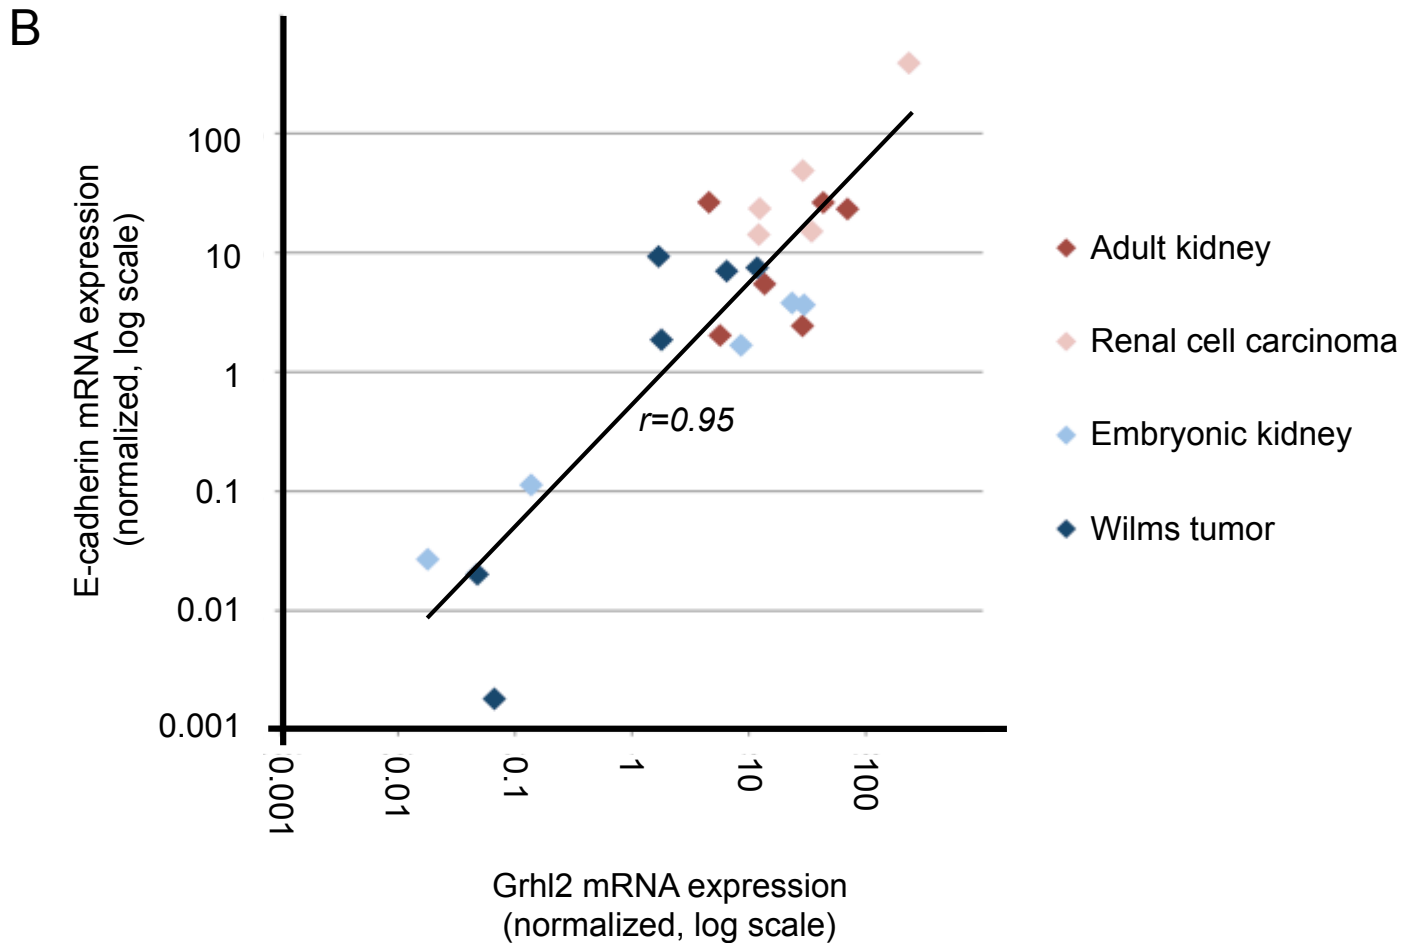

Supplement: dev055483figs4.pdf [file dev055483figs4.pdf]

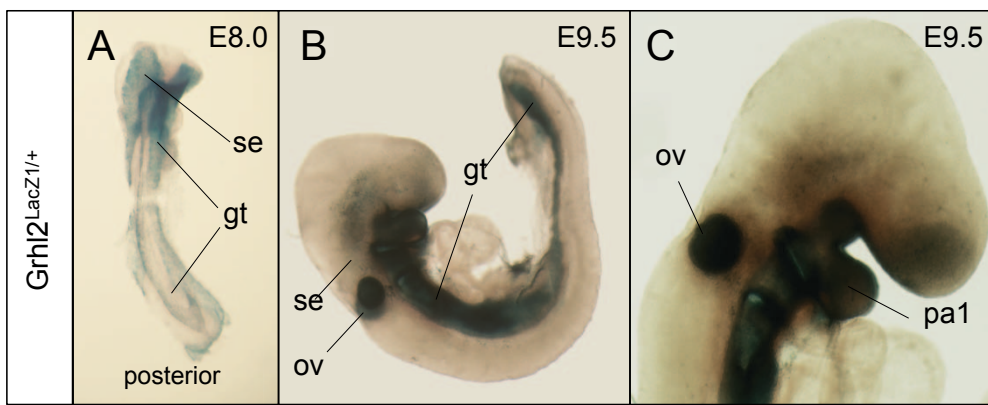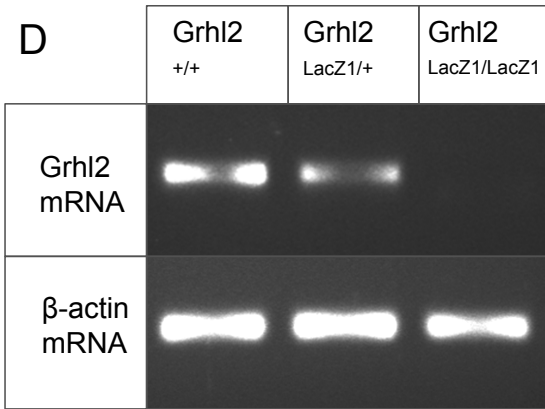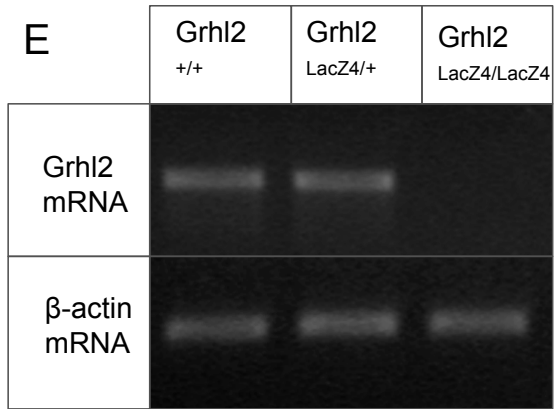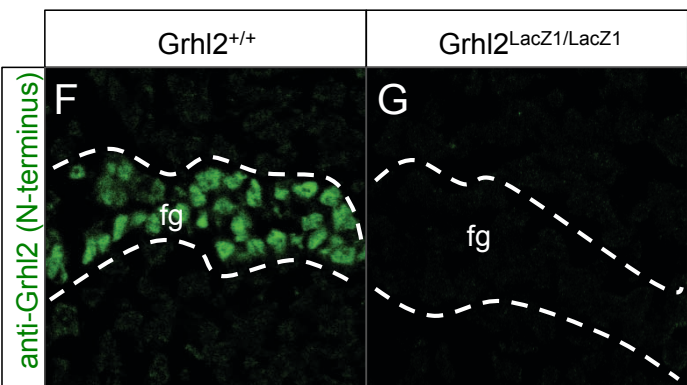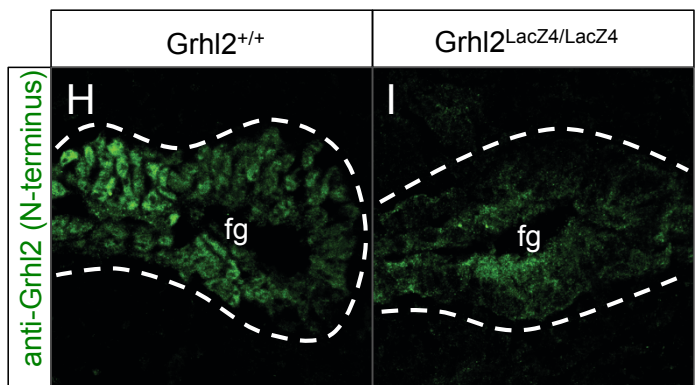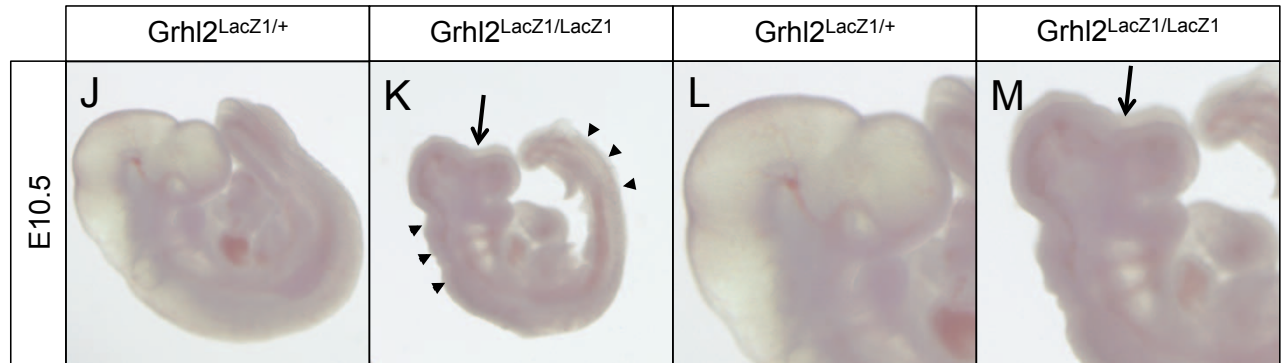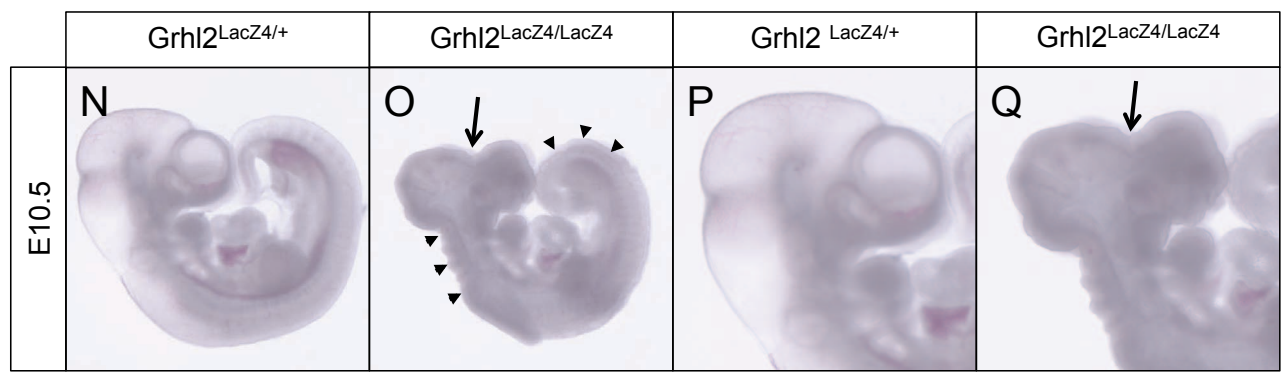

Supplement: dev055483figs5.pdf [file dev055483figs5.pdf]

mIMCD-3  
cells

adult  
mouse  
skin

Grhl1

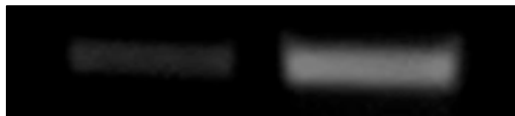

Grhl2

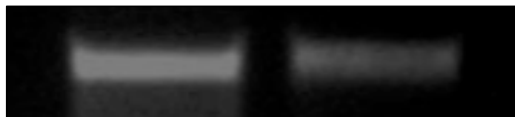

Grhl3

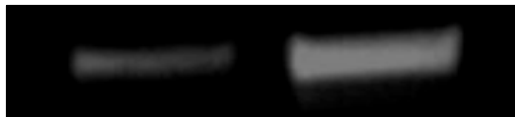

$\beta$ -Actin

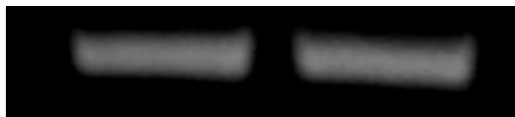

Supplement: dev055483figs6.pdf [file dev055483figs6.pdf]

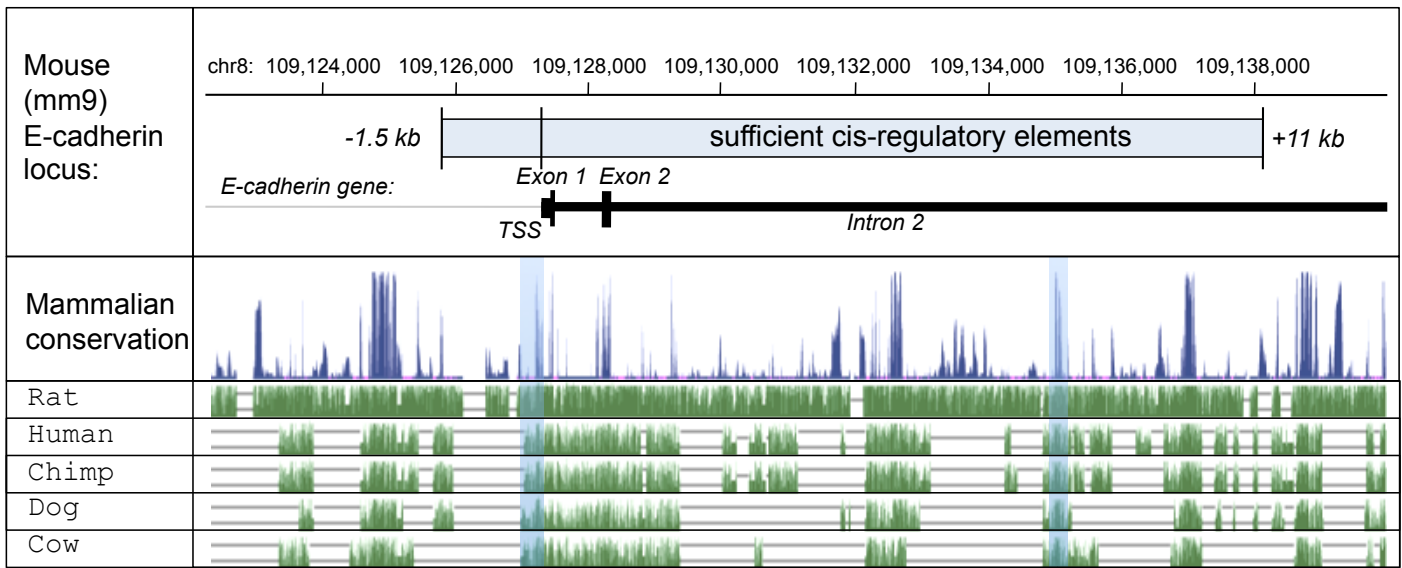

core promoter

grainyhead motifs

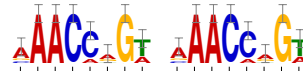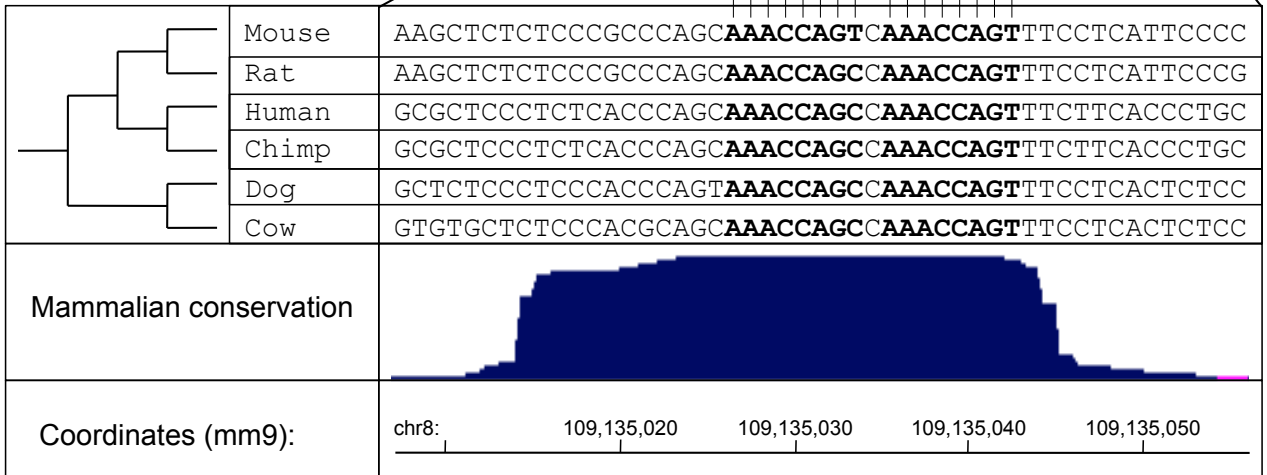

Supplement: dev055483figs7.pdf [file dev055483figs7.pdf]

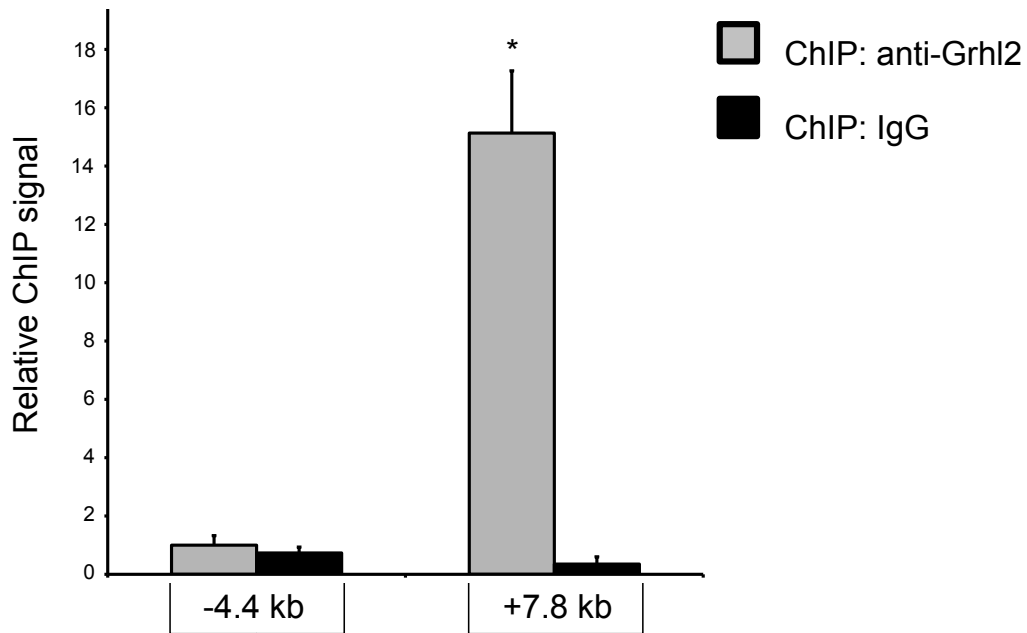

Exon 1 Exon 2

*E-cadherin* gene:

TSS

Intron 2

grainyhead  
consensus

chr8: 109,122,000 109,124,000 109,126,000 109,128,000 109,130,000 109,132,000 109,134,000 109,136,000 109,138,000

Supplement: dev055483figs8.pdf [file dev055483figs8.pdf]

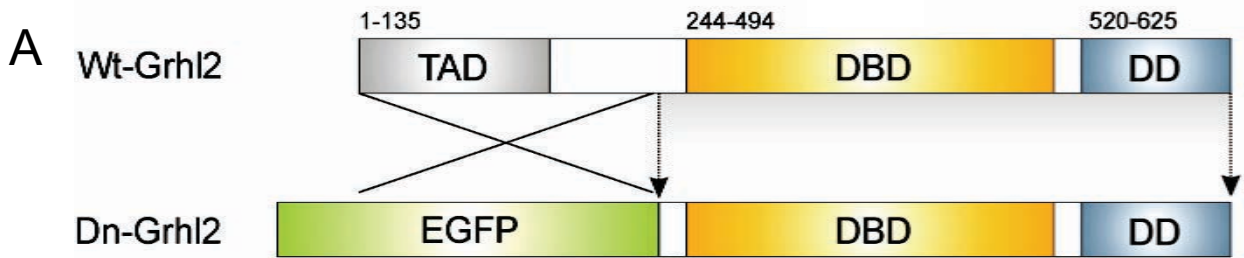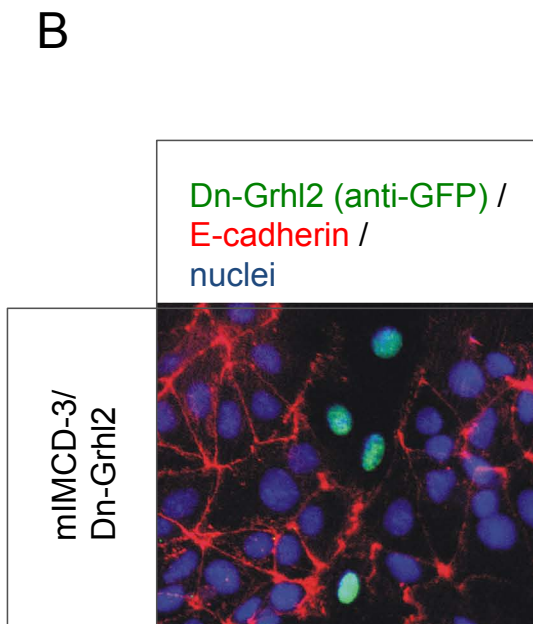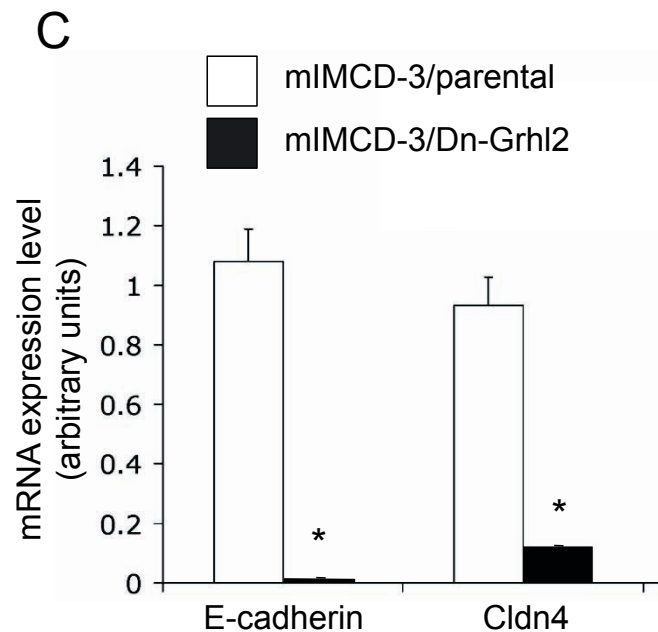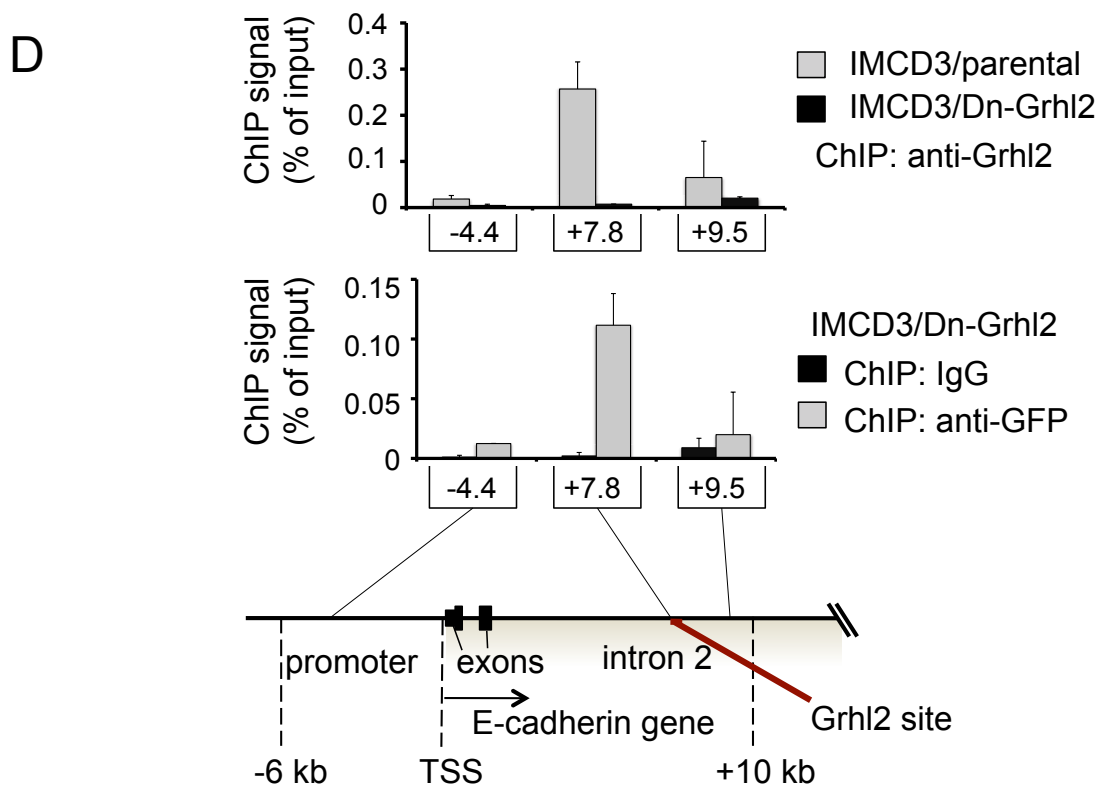

Supplement: dev055483figs9.pdf [file dev055483figs9.pdf]
